# Supplementary material
Source: PubMed Central journal article supplement (PMC1815270)

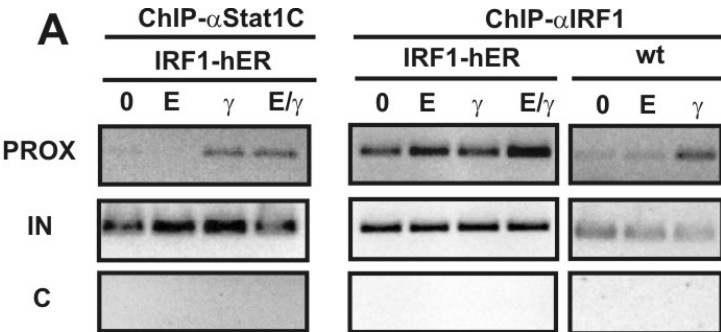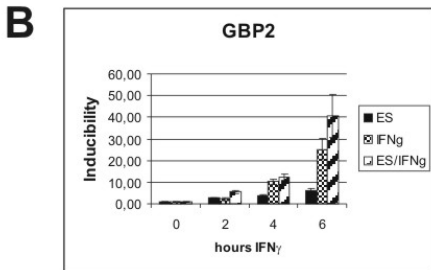

Supplement: pnas_0610944104_1.pdf [file pnas_0610944104_1.pdf]
